# Supplementary material for: Effectiveness of health checkup with depression screening on depression treatment and outcomes in middle-aged and older adults: a target trial emulation study
Source: PubMed Central journal article supplement (PMC10701157; doi:10.1016/j.lanwpc.2023.100978), 2023-11-23

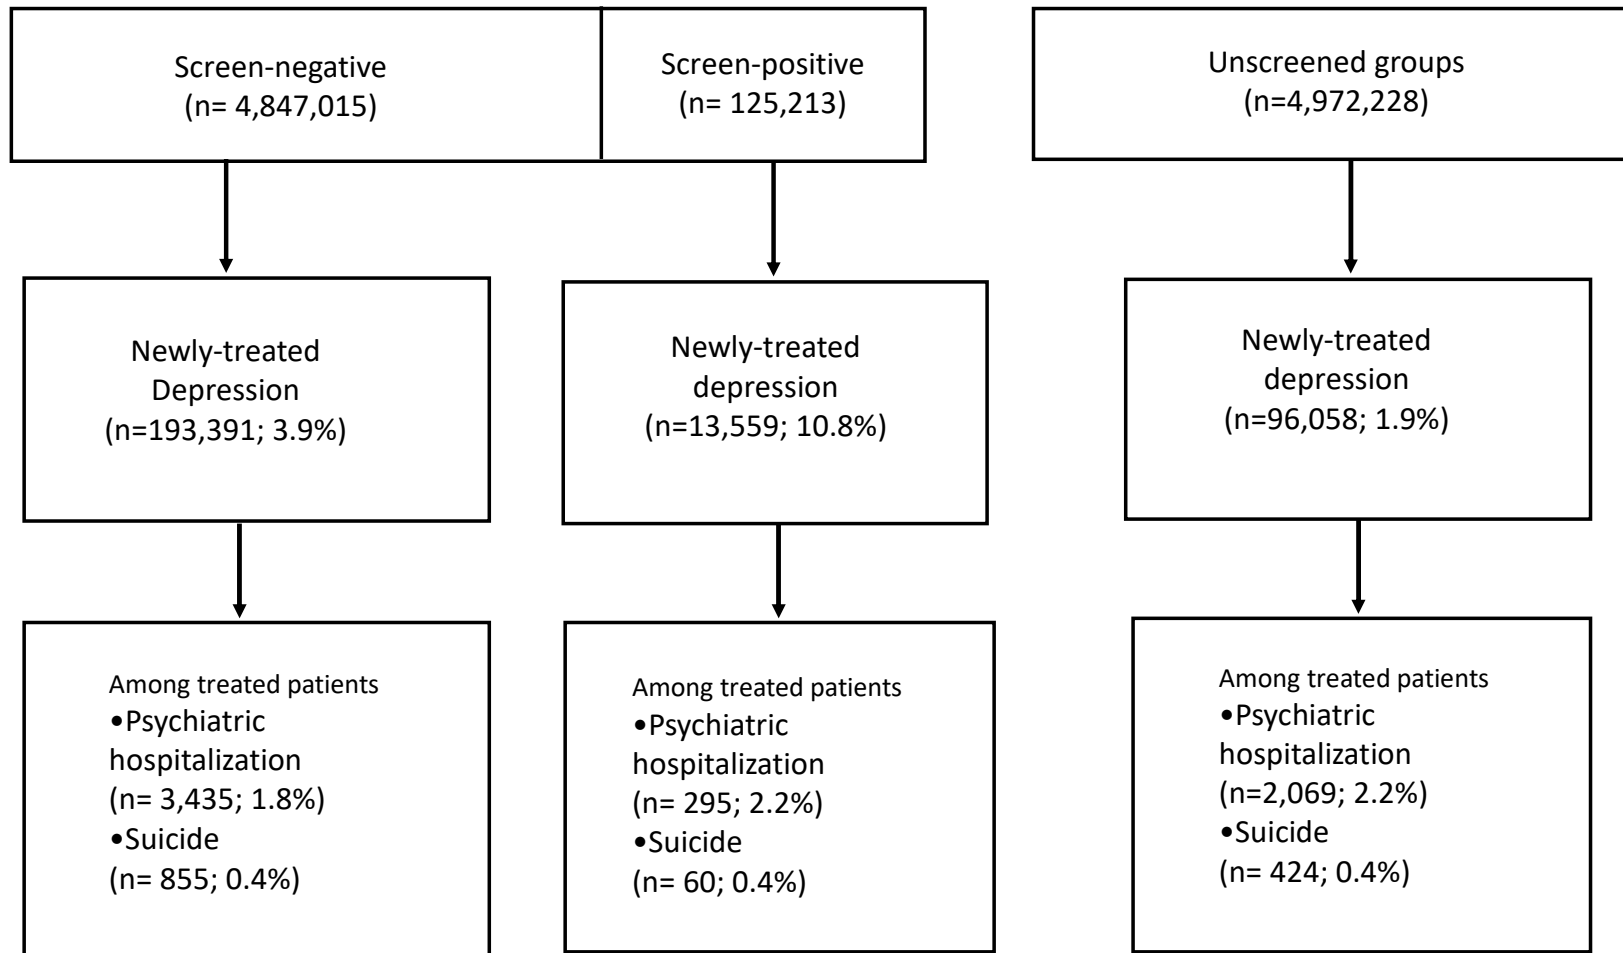

Supplement: mmc3.pdf [file mmc3.pdf]
